# Supplementary material
Source: Elsevier journal article supplement (https://www.sciencedirect.com/science/article/pii/S1138359321001362)
Supplement: mmc1 [file S1138359321001362:mmc1.doc]

**Anexo I Check-List**

**“Monitoreo de la planificación e implementación de la consulta no presencial”**

1. ¿Se ha constituido un grupo que lidere el cambio, se encargue de la planificación, implantación y seguimiento de las consultas no presenciales?
   1. ¿Participan todas las categorías profesionales en este grupo?
2. En la fase de planificación
   1. ¿Se han analizado las experiencias y la bibliografía al respecto?
   2. ¿Se han mapeado los procesos actuales e identificado cuáles pueden ser atendidos on-line sin ningún tipo de problemas para establecer un mínimo de procesos por los que empezar?
   3. ¿Se han definido claramente los beneficios esperados?
   4. ¿Se ha revisado la carga de trabajo de referencia, las pautas y los tipos de demanda?
   5. ¿Se ha reestructurado la rutina de trabajo?
   6. ¿Se ha cambiado la estructura de la agenda de citas para utilizar eficazmente las consultas no presenciales?
   7. ¿Se ha tenido en cuenta en el diseño las necesidades del paciente y la continuidad?
   8. ¿Se ha definido el flujo de las consultas de la oferta disponible? (telefónica, videoconferencia, presencial o domiciliaria)
   9. ¿Se ha planificado cómo va a satisfacer las necesidades de aquellos que no pueden o no quieran usar los servicios en línea?
   10. ¿Se han construido y consensuado procesos con los profesionales?
   11. ¿Se comprueba que todos los profesionales conocen el protocolo y el flujo de trabajo?
   12. ¿Se han definido planes de contingencia?: por ejemplo, decidir el enfoque estratégico para la implantación de la consulta telefónica (implantación completa vs gradual vs por objetivo).
   13. ¿Se ha pilotado antes de empezar o avanzar en nuevos procesos?
3. En la fase de monitorización y evaluación
   1. ¿Se han diseñado indicadores y la recogida de información necesaria para monitorear el funcionamiento y evaluar el impacto fácilmente?
   2. ¿Se facilita la retroalimentación y la posibilidad de compartir ideas con todo el equipo, para rediseñar el proceso?
   3. ¿Se facilita la retroalimentación y la posibilidad de compartir ideas con los usuarios del servicio, para rediseñar el proceso?
4. En los profesionales
5. ¿Se ha buscado conseguir el consenso de los profesionales para el cambio?
6. ¿Se ha asegurado que todo el personal ha leído y entendido las nuevas políticas/protocolos y que comprendan sus nuevas funciones y responsabilidades?
7. ¿Se ha comprobado que el personal sanitario se ha familiarizado con:
8. Cómo se ven las consultas no presenciales.
9. Cómo revisarlas (incluyendo cómo se identifican los síntomas graves)
10. La buena práctica en el diagnóstico, tratamiento y la recogida de la información.
11. La evaluación de la idoneidad del paciente para la atención no presencial.
12. Cómo responder y con los procesos para organizar/notificar a los pacientes si se requiere una cita presencial o una segunda llamada.
13. Cómo realizar una consulta por vídeo (si procede)
14. En los pacientes
    1. ¿Se informa a los pacientes de forma clara sobre el funcionamiento de la consulta no presencial y los beneficios esperados?
    2. ¿Se facilita a los pacientes herramientas para la preparación de la consulta telefónica? **(ANEXO II)**.
    3. ¿Se da una respuesta rápida a la libre elección de médico de cabecera cuando se solicita?
15. Sobre aspectos clave de promoción
    1. ¿Se decide si se promocionará la consulta no presencial antes o después de su puesta en marcha? (SMS, carteles, folletos, pancartas, pantallas electrónicas, demostraciones en la sala de espera).
    2. ¿Se pone el banner de consulta no presencial a la hora de pedir cita?
    3. ¿Se hacen cumplir los tiempos de respuesta?
    4. ¿Se asegura que la información sobre lo que los pacientes deben hacer si tiene una emergencia esté clara y accesible?
    5. ¿Se anima al personal de recepción y a los clínicos a promover el servicio entre los pacientes?
