# Supplementary material
Source: Elsevier journal article supplement (https://www.sciencedirect.com/science/article/pii/S1138359321001362)
Supplement: mmc2 [file S1138359321001362:mmc2.doc]

**Anexo II Guía para pacientes**

**“Cómo preparar la entrevista telefónica con su médico de atención primaria”**

Esta Guía le ayudará a preparar con anticipación la llamada telefónica que su médico le va a hacer para atender su problema de salud.

Tener un rol activo en su atención le ayudará a obtener la mejor atención posible, aprovechando al máximo su consulta telefónica.

A continuación, encontrará algunos consejos que puede seguir para saber qué hacer antes, durante y después de la consulta telefónica con su médico. Seguir estos consejos podrán ayudarles a su médico y a usted para mejorar su salud.

***Esté preparado.***

Por lo general, solo tendrá unos minutos para la consulta telefónica con su médico.

Atienda la llamada desde un lugar tranquilo, privado y que le permita tomar notas.

Para asegurarse de que usted y su médico aprovechen al máximo el tiempo, piense previamente a la cita telefónica, sus preguntas y escríbalas y así no tendrá que preocuparse de recordar todo lo que tiene que decirle a su médico. Como ayuda puede utilizar la ficha - formulario que acompaña a esta hoja.

Algunos temas que podría recoger por escrito antes de su consulta telefónica son:

- Si su problema ya es conocido por su médico o es nuevo.
- En el caso de ser nuevo, explíquelo.
- Qué síntomas recientes tiene.
- Qué medicación está tomando en la actualidad, que dosis, cuantas veces al día o si cree que alguna le está produciendo algún problema concreto.
- Que medicación necesita que sea renovada en su tarjeta sanitaria.
- Si necesita alguna documentación, téngala a mano: Informe clínico, parte de baja laboral, etc.
- Es importante que recoja y anote los valores más actuales de las constantes que autocontrola y están en relación con su problema actual: tensión arterial, pulso, temperatura, peso, glucemia, etc.

Considere si cree conveniente que algún miembro de la familia o cuidador de confianza esté con usted para escuchar, tomar notas y hacer preguntas.

***Hable con su médico*.**

Plantéele los problemas por orden de importancia para usted.

No tenga miedo de hablar durante su consulta.

Es importante que pregunte a su médico cada vez que no entienda algo.

Estas son algunas preguntas que puede hacerle a su médico:

- ¿Qué significan mis síntomas?
- ¿Debería hacerme una prueba para detectar una enfermedad o afección?
- ¿Qué provocó esta afección?
- ¿Cuán grave es la afección?
- ¿Cuál es el tratamiento?
- ¿El tratamiento tiene efectos secundarios?
- ¿Cuánto tiempo llevará el tratamiento?
- ¿Cómo afectará esta enfermedad a mi calidad de vida, ahora y en el futuro?

| **MUY IMPORTANTE: Dígale a su médico si considera importante que le atienda presencialmente en su consulta y los motivos.** |
| --- |

***Como puedo acceder a la información durante o tras la consulta*** *(aplicado a la Comunidad Autónoma de Andalucía)*

Es muy importante que las indicaciones que le aporte su médico queden reflejadas en algún soporte para poder consultarlas en cualquier momento:

- Usted o un familiar puede ir anotando las indicaciones de su médico.
- Si posee certificado digital oacceso Cl@ve, tras la consulta, podrá consultar las indicaciones de su médico y sus datos de salud (informes clínicos, su medicación, sus pruebas analíticas y radiografías) en Clic Salud[[1]](#footnote-1)**,** en el siguiente enlace o código QR:

|  | 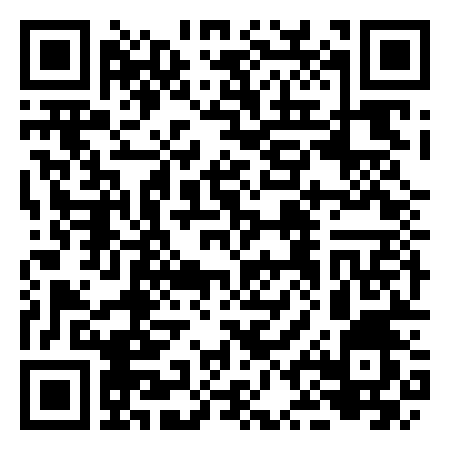 http://bit.ly/ClicSalud |
| --- | --- |

- Si no posee certificado digital o acceso Cl@ve, usted tendrá acceso a informes o intercambio de documentos, imagen o vídeo con el médico a través de la a aplicación MERCURIO[[2]](#footnote-2). El médico podrá enviarle informes, recetas o partes, o bien recibir documentos, imágenes o vídeos de usted.

|  | 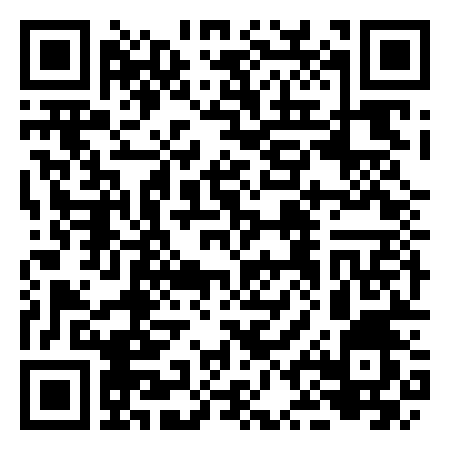 http://bit.ly/EnviaMercurio |
| --- | --- |

**FORMULARIO DE PREPARACION DE LA CONSULTA NO PRESENCIAL EN ATENCION PRIMARIA**

**Fecha de la cita:** dd/mm/aaaa **Hora: _______**

**¿Su problema es nuevo?** SI 🞎 NO 🞎

**Si es nuevo, explíquelo:**

|  |
| --- |

**¿Qué síntomas recientes presenta?**

**1.-**

**2.-**

**3.-**

**4.-**

**¿Qué medicación toma actualmente?**

| **Medicamento** | **Renovar**  **(SI/NO)** | **Dosis** | **Tomas diarias** | **Efecto secundario** |
| --- | --- | --- | --- | --- |
|  |  |  | 🞎M 🞎T 🞎N |  |
|  |  |  | 🞎M 🞎T 🞎N |  |
|  |  |  | 🞎M 🞎T 🞎N |  |
|  |  |  | 🞎M 🞎T 🞎N |  |
|  |  |  | 🞎M 🞎T 🞎N |  |
|  |  |  | 🞎M 🞎T 🞎N |  |

**Valores de los siguientes parámetros:**

Presión arterial: ____ /_____ Pulso: ____ Tª: _____ Peso: ______ Glucosa en sangre: ______

Saturación de oxigeno: ______

**Necesita algún documento**: 🞎 Parte de baja laboral 🞎Informe clínico

🞎 Otro: ­­­­­­­­­­­­­­­____

1. Consulte sus datos de salud a través de Clic Salud: Hacer un seguimiento de su historial de salud le ayuda a ser un paciente informado. El conocimiento le permite tener más control de su atención médica y le ayuda a mantenerse saludable. Consulte instrucciones de cómo acceder a Clic-salud. Puede ver un vídeo explicativo en la siguiente dirección o usar el código QR:

   | 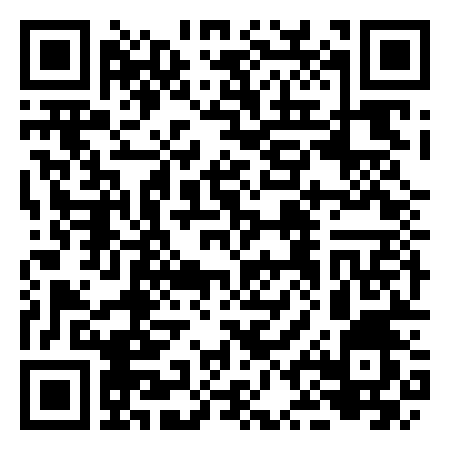 | http://bit.ly/VideosClicSalud |
   | --- | --- |

   [↑](#footnote-ref-1)
2. Mercurio es una plataforma que permite, de una forma segura, el envío de archivos de médicos a ciudadanos y de ciudadanos a médicos. Consulte instrucciones de cómo recibir o enviar archivos con este enlace o usando el código QR:

   Recibir archivos:

   | 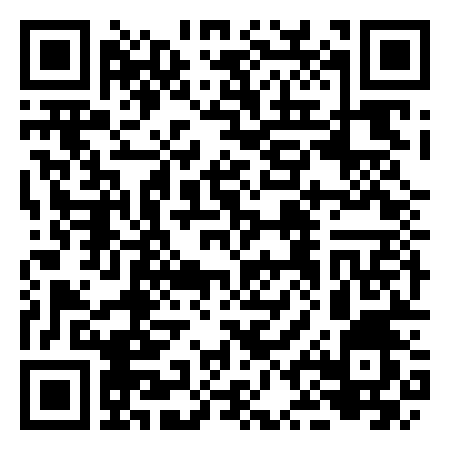 | http://bit.ly/RecibeMercurio |
   | --- | --- |

   Enviar archivos:

   | 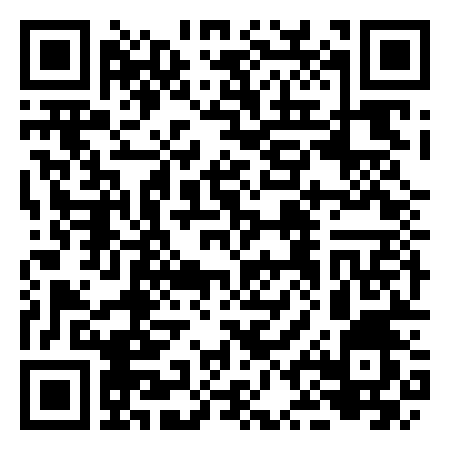 | http://bit.ly/EnviaMercurio |
   | --- | --- |

   [↑](#footnote-ref-2)
