# Supplementary material
Source: Elsevier journal article supplement (https://www.sciencedirect.com/science/article/pii/S1138359321001362)
Supplement: mmc3 [file S1138359321001362:mmc3.doc]

**Anexo III Monitorización y Evaluación de la Consulta Telefónica (CT) en Atención Primaria: variables e indicadores**

| **1.- Profesional** |
| --- |
| Centro: |
| Código del profesional que realiza la consulta: |
| Categoría profesional:  🞎 Medicina familiar y comunitaria  🞎 Enfermería  🞎 Pediatría  🞎 Odontólogo  🞎 …. |

| **2.- Descripción del perfil del paciente** atendido de forma telefónica en comparación con el tipo de pacientes que acude a la consulta presencial. | |
| --- | --- |
| **Variables** | **indicadores** |
| Edad | Frecuencia por grupos de edad (< 7 años, 7 a 14 años, 15 a 40 años, 41 a 55 años, 56 a 69 años, >= 70 años) de los pacientes que acuden a las consultas presenciales y consultas telefónicas. |
| Género | Frecuencia por sexo (Mujer/Hombre) de los pacientes que acuden a la consulta presencial y telefónica. |
| Afiliación del paciente | Frecuencia de pacientes del cupo del profesional / Paciente de otro cupo, atendidos en la consulta presencial y telefónica. |
| Nivel de familiaridad del paciente con su profesional sanitario | Frecuencias de pacientes de 1ª visita (No conocido) / Consulta esporádica (Poco conocido) / Paciente habitual (Muy conocido), en la consulta presencial y telefónica. |
| Nivel de complejidad del paciente[[1]](#footnote-1) | Frecuencias de los pacientes del Grupo 0 / Grupo 1 / Grupo 2 / Grupo 3, para la consulta presencial y telefónica. |

| **3.- Cambios en la actividad de consulta a demanda y programada, en el propio centro y a domicilio** | |
| --- | --- |
| **Variables** | **indicadores** |
| Variación en el Nº total de consultas de medicina de familia, enfermería y totales x 100 Tarjetas Ajustadas por Edad (TAE) tras la implantación de la consulta no presencial | % de variación en el nº total de consultas de Medicina de Familia (MF), en el de enfermería y totales por cada 100 TAE en un periodo de tiempo tras la implantación de la consulta telefónica en comparación con el mismo periodo de tiempo del año anterior. |
| Variación en el nº de consultas telefónicas de medicina de familia, enfermería y totales x 100 TAE tras la implantación de la consulta no presencial | % de variación en el nº de consultas presenciales de MF, de enfermería y totales por cada 100 TAE en un periodo de tiempo tras la implantación de la consulta telefónica en comparación con el mismo periodo de tiempo del año anterior |
| Variación en el nº de consultas telefónicas de medicina de familia, enfermería y totales x 100 TAE tras la implantación de la consulta no presencial | % de variación en el Nº de consultas telefónicas de MF, de enfermería y totales por cada 100 TAE en un periodo de tiempo tras la implantación de la consulta telefónica en comparación con el mismo periodo de tiempo del año anterior |
| Variación en el nº de consultas a domicilio de medicina de familia, enfermería y totales x 100 TAE tras la implantación de la consulta telefónica | % de variación en el nº de consultas a domicilio de MF, de enfermería y totales por cada 100 TAE en un periodo de tiempo tras la implantación de la consulta telefónica en comparación con el mismo periodo de tiempo del año anterior |

| **4.- Diferencias de funcionamiento de la consulta telefónica en relación a la presencial** | |
| --- | --- |
| Demora en atender desde la petición de la cita a la fecha de la consulta | Tiempo transcurrido desde la petición de cita (en días) consulta telefónica vs presencial |
| Demoras en conectarse (teléfono / videoconferencia) el profesional con el paciente desde la hora prevista en la cita | Tiempo transcurrido desde la hora de la cita (en minutos) consulta telefónica vs presencial |
| Duración media de la consulta (en minutos) | Tiempo medio de duración de la consulta telefónica / Consulta presencial (en minutos) |
| Acceso y utilización de la Historia Clínica del paciente en la consulta telefónica | Porcentaje de consulta telefónica en las que se ha abierto la Historia clínica y se ha escrito al menos el motivo de consulta |
| Motivos de consulta telefónica versus presencial | Comparación de frecuencias en motivos de consulta:  🞎 Trámites: informes, renovación partes de Incapacidad Transitoria, Recetas  🞎 Proceso agudo leve  🞎 Proceso agudo complejo  🞎 Seguimiento patología conocida  🞎 Proceso recurrente en el paciente  🞎 Comunicar el resultado de una prueba  🞎 Intervención de promoción de la salud  🞎 Captación de un programa preventivo |
| Solicitud de pruebas complementarias en la consulta | % de variación en la media de pruebas diagnósticas (Analíticas + Radiología) por consulta solicitadas en laa consulta telefónica en comparación con la presencial |
| Derivaciones del paciente a una consulta hospitalaria o al servicio de urgencias del hospital en la consulta telefónica | Tasa de derivación por cada 100 consultas telefónicas / tasa de derivación por cada 100 consultas presenciales |
| Problemas de disconformidad del paciente con la consulta | Tasa de reclamaciones por cada 100 consultas telefónicas /Tasa de reclamaciones por cada 100 consultas presenciales |
| Derivación por parte del profesional sanitario a una consulta presencial, desde la consulta telefónica | Porcentaje de consultas telefónicas que fueron derivadas a una consulta presencial |
| Necesidad de una nueva consulta presencial | Porcentaje de pacientes que solicitan una cita presencial en los 20 días posteriores al ser atendidos en una consulta telefónica. |

| **5.- Impacto en los resultados clínicos** | |
| --- | --- |
| **Variables** | **indicadores** |
| En urgencias hospitalarias y de Atención Primaria (AP) | Porcentaje de desviación en la tasa de asistencia en urgencias hospitalarias y Servicio de Urgencia de AP (nº de urgencias de pacientes del centro de salud/profesional x 100 TAE) durante un periodo de tiempo, desde la implantación de la consulta telefónica en un centro de salud (o para un profesional concreto), en comparación con el mismo periodo de tiempo del año anterior a la implantación de la consulta telefónica |
| En ingresos por condiciones sensibles a cuidados ambulatorios en AP | Porcentaje de desviación en la tasa de ingresos (Nº de ingresos x 1000 TAE) por condiciones sensibles a cuidados ambulatorios durante un periodo de tiempo, desde la implantación de la consulta telefónica en un centro de salud, en comparación con el mismo periodo de tiempo del año anterior a la implantación de la consulta telefónica |
| En derivaciones a consultas hospitalarias | Porcentaje de desviación en la tasa de derivaciones (Nº de derivaciones del centro de salud/profesional x 100 TAE) a las consultas hospitalarias durante un periodo de tiempo, desde la implantación de la consulta telefónica en un centro de salud (o para un profesional concreto), en comparación con el mismo periodo de tiempo del año anterior a la implantación de la consulta telefónica |
| Sobre el total de ingresos hospitalarios | Porcentaje de desviación en la tasa de ingresos hospitalarios totales (nº de ingresos hospitalarios x 1000 TAE) durante un periodo de tiempo, desde la implantación de la consulta telefónica en un centro de salud, en comparación con el mismo periodo de tiempo del año anterior a la implantación de la consulta telefónica |
| Petición total de pruebas de laboratorio | Porcentaje de desviación en la tasa de peticiones de pruebas de laboratorio por total de consultas durante un periodo de tiempo, desde la implantación de la consulta telefónica en un centro de salud (o para un profesional concreto), en comparación con el mismo periodo de tiempo del año anterior a la implantación de la consulta telefónica |
| Petición total de pruebas de radiodiagnóstico | Porcentaje de desviación en la tasa de peticiones de pruebas de radiodiagnóstico por total de consultas durante un periodo de tiempo, desde la implantación de la consulta telefónica en un centro de salud (o para un profesional concreto), en comparación con el mismo periodo de tiempo del año anterior a la implantación de la consulta telefónica |
| En número de recetas | Porcentaje de desviación en el número de recetas por consultas durante un periodo de tiempo, desde la implantación de la consulta telefónica en un centro de salud (o para un profesional concreto), en comparación con el mismo periodo de tiempo del año anterior a la implantación de la consulta telefónica |

1. https://www.saludcastillayleon.es/transparencia/es/transparencia/informacion-datos-publicos/datos-interes/estratificacion-pacientes-clasificacion-grado-complejidad Acceso: 2020 (15 noviembre 2020) [↑](#footnote-ref-1)
